# 1        **Streamlining Intersectoral Provision of Real-World Health Data: A** 2        **Service Platform for Improved Clinical Research and Patient Care**

3        **Katja Hoffmann<sup>1\*</sup>, Igor Nesterow<sup>1</sup>, Yuan Peng<sup>1</sup>, Elisa Henke<sup>1</sup>, Daniela Barnett<sup>3</sup>, Cigdem**  
4        **Klengel<sup>1</sup>, Mirko Gruhl<sup>1</sup>, Martin Bartos<sup>2</sup>, Frank Nüßler<sup>2</sup>, Richard Gebler<sup>1</sup>, Sophia Grummt<sup>1</sup>,**  
5        **Anne Seim<sup>1</sup>, Franziska Bathelt<sup>4</sup>, Ines Reinecke<sup>3</sup>, Markus Wolfien<sup>1,5</sup>, Jens Weidner<sup>1</sup>, Martin**  
6        **Sedlmayr<sup>1</sup>**

7        <sup>1</sup>Institute for Medical Informatics and Biometry, Faculty of Medicine Carl Gustav Carus, Technische  
8        Universität Dresden, Dresden, Germany

9        <sup>2</sup>Department of Information Technology, Klinikum Chemnitz gGmbH, Chemnitz, Germany

10       <sup>3</sup>Data Integration Center, Center for Medical Informatics, University Hospital Carl Gustav Carus,  
11       Dresden, Germany

12       <sup>4</sup>Thiem-Research GmbH, Cottbus, Germany

13       <sup>5</sup>Center for Scalable Data Analytics and Artificial Intelligence, Dresden/Leipzig, Germany

14       \* **Correspondence:**

15       Katja Hoffmann

16       [katja.hoffmann@tu-dresden.de](mailto:katja.hoffmann@tu-dresden.de)

17       **Keywords: Service Platform, Intersectoral Data Sharing, Health Data Space, Real World Data,**  
18       **Interoperability, Data harmonization, Research Data Infrastructure, Secondary Use of Clinical**  
19       **Data**

## 20       **Abstract**

21       **Introduction:** Obtaining real-world data from routine clinical care is of growing interest for scientific  
22       research and personalized medicine. Despite the abundance of medical data across various facilities —  
23       including hospitals, outpatient clinics, and physician practices — the intersectoral exchange of  
24       information remains largely hindered due to differences in data structure, content, and adherence to  
25       data protection regulations. In response to this challenge, the Medical Informatics Initiative (MII) was  
26       launched in Germany, focusing initially on university hospitals to foster the exchange and utilization  
27       of real-world data through the development of standardized methods and tools, including the creation  
28       of a common core dataset. Our aim, as part of the Medical Informatics Research Hub in Saxony

29 (MiHUBx), is to extend the MII concepts to non-university healthcare providers in a more seamless  
30 manner to enable the exchange of real-world data among intersectoral medical sites.

31 **Methods:** We investigated what services are needed to facilitate the provision of harmonized real-  
32 world data for cross-site research. On this basis, we designed a Service Platform Prototype that hosts  
33 services for data harmonization, adhering to the globally recognized Health Level 7 (HL7) Fast  
34 Healthcare Interoperability Resources (FHIR) international standard communication format and the  
35 Observational Medical Outcomes Partnership (OMOP) Common Data Model (CDM). Leveraging  
36 these standards, we implemented additional services facilitating data utilization, exchange and  
37 analysis. Throughout the development phase, we collaborated with an interdisciplinary team of experts  
38 from the fields of system administration, software engineering and technology acceptance to ensure  
39 that the solution is sustainable and reusable in the long term.

40 **Results:** We have developed the pre-built packages “ResearchData-to-FHIR”, “FHIR-to-OMOP” and  
41 “Addons”, which provide the services for data harmonization and provision of project-related real-  
42 world data in both the FHIR MII Core dataset format (CDS) and the OMOP CDM format as well as  
43 utilization and a Service Platform Prototype to streamline data management and use.

44 **Conclusion:** Our development shows a possible approach to extend the MII concepts to non-university  
45 healthcare providers to enable cross-site research on real-world data. Our Service Platform Prototype  
46 can thus pave the way for intersectoral data sharing, federated analysis, and provision of SMART-on-  
47 FHIR applications to support clinical decision making.

## 48 1 Introduction

49 For scientific research, there is a high interest in using data from routine clinical care, so-called real-  
50 world data (RWD) (1–4). Although large amounts of RWD are available in various institutions, such  
51 as hospitals, outpatient clinics, and physician practices, the intersectoral data exchange between sites  
52 is hindered by their heterogeneity in terms of structure, content, and compliance with data protection  
53 regulations (2,5). To address this challenge, the German Medical Informatics Initiative (MII) was  
54 launched in 2018, initially focusing on university hospitals to foster the exchange and utilization of  
55 RWD (6,7). At that time, Data Integration Centers (DIC) were established at the medical sites of the  
56 university hospitals, and standardized solutions were developed for effective data use and exchange in  
57 both healthcare and research, with a focus on interoperability and data harmonization. For example, all  
58 university hospitals in the MII defined a dataset description, the MII Core dataset (CDS) (8) using the

59 Health Level 7 (HL7) Fast Healthcare Interoperability Resources (FHIR) international standard  
60 communication format (9). The FHIR MII CDS consists of basic modules (e.g., Person, Case,  
61 Diagnosis, Procedure, Laboratory test results, medication), and extension modules (e.g., Oncology,  
62 Pathology results, Molecular Genetics, Intensive care) (8). This forms the foundation for cross-site data  
63 exchange and the integration of third-party applications via SMART-on-FHIR technology (10).

64 To facilitate the data exchange of RWD for scientific purposes, the HL7 International (11) and the  
65 Observational Health Data Sciences and Informatics (OHDSI) (12,13) community have announced  
66 collaboration in 2021 (14). The OHDSI community develops the Observational Medical Outcomes  
67 Partnership (OMOP) common data model (CDM) (15), as well as tools for data quality assessment and  
68 analysis (16). Common to all standardized data formats is the need to develop individual processes for  
69 the extraction, transformation and loading (ETL) of data from different data sources, which remains a  
70 major challenge (5). Nevertheless, hospitals have succeeded in overcoming these initial hurdles and  
71 making their own RWD available in a harmonized form for research (17,18) and possibly also for  
72 patient care.

73 Since certain diseases, such as cardiovascular diseases, diabetes, allergies, and mental illnesses, are  
74 often not treated at university hospitals and there is insufficient data available, especially for rare  
75 diseases, it is essential to obtain RWD as well from non-university healthcare providers to ensure a  
76 comprehensive and diverse dataset for research studies. In order to make RWD available for research  
77 by non-university healthcare providers, the Medical Informatics Hub in Saxony (MiHUBx) was  
78 founded in 2021 (19). Among the project goals is to investigate whether the concepts of the MII can  
79 be transferred to non-university healthcare providers. As a first result within this project, Bathelt et al.  
80 (2022) demonstrated the possibility to utilize an existing portable and standardized infrastructure from  
81 a university hospital setting and transferred it to non-university sites to support feasibility requests for  
82 participation in multicentre studies (1). However, the work of Bathelt et al. was limited in terms of data  
83 availability, terminologies used, and harmonized data formats, so that RWD from non-university sites  
84 are still insufficiently available for research. Yet, due to limited human and economic resources and  
85 expertise in HL7 FHIR and OMOP CDM, it is hardly possible for non-university healthcare providers  
86 to develop the required services for data harmonization and provision in standardized data formats  
87 themselves. It is therefore necessary to provide the services in such a way that they can be conveniently  
88 deployed and easily used by data providers for different studies. In this paper, all tools for data

89 harmonization, provision and management, such as databases, programs for ETL processes, analysis  
90 tools and other applications, are referred to as services.

91 The aim of this work is the development of pre-built packages that contain services and support the  
92 harmonization and provision of RWD in FHIR MII CDS and OMOP CDM format and thereby provide  
93 reuse potential for various projects. Another goal of this work is the development of a versatile and  
94 modular Service Platform Prototype that facilitates project administration, service management, data  
95 management and analysis. In this context, we focus on the following two research questions:

- 96 1. What services are needed to facilitate the provision of harmonized RWD for cross-site  
97 research?
- 98 2. How can the necessary services (from 1) be technically compiled so that they can be used by  
99 hospitals with few resources and limited expertise in HL7 FHIR and OMOP CDM to make  
100 harmonized RWD accessible for research studies?

## 101 **2 Materials and methods**

### 102 **2.1 Materials for data harmonization and provision**

#### 103 **2.1.1 Compilation and integrated implementation of existing software resources**

104 For the harmonization of RWD from source systems into the basic modules of the FHIR MII CDS  
105 version 1.0 (20), and into the OMOP CDM format (15), we have selected the following materials, as  
106 these are successfully used at the University Hospital Dresden. In addition, we investigated the  
107 applicability of other established tools. For this purpose, we used the following developed concepts of  
108 the MII and the software tools published by the MII consortium Medical Informatics in Research and  
109 Care in University Medicine (MIRACUM) (21) as MIRACOLIX Tools (22):

110 **Clinical Data Repository:** A Clinical Data Repository (CDR) is a database in which patient-centered  
111 healthcare data from various IT systems (e.g., electronic health record (EHR), laboratory system,  
112 biobank) are stored in a site-specific data model.

113 **FHIR Server BLAZE:** A FHIR Server is a software solution that stores and manages FHIR resources.  
114 It acts as a bridge connecting healthcare applications and systems, allowing them to exchange patient  
115 information in a consistent and structured format or to answer population-wide aggregate queries  
116 quickly. The FHIR Server BLAZE (23) was initially developed within the German Biobank Alliance

117 project (24), aimed at high-throughput performance (25). Blaze comes with a built-in feature to  
118 authenticate requests against an OpenID Connect provider.

119 **MIRACUM FHIR Gateway:** The MIRACUM FHIR Gateway (26) is a PostgreSQL database with a  
120 table for storing FHIR Resources, which are represented in JSON format. It serves as a temporary  
121 storage.

122 **ETL Process DWH-TO-FHIR:** The ETL Process DWH-TO-FHIR extracts research data, which is  
123 provided as database views, from the data warehouse (DWH) of the site, constructs FHIR resources  
124 according to the FHIR MII CDS structure definition v1.0 and loads them into a *MIRACUM FHIR*  
125 *Gateway*. The application DWH-TO-FHIR provides Basic Authentication (27) to enforce access  
126 controls to the FHIR resources of the FHIR server.

127 **ETL Process ROTATOR:** The ROTATOR (fROm gaTewAy TO seRver) is an application that reads  
128 FHIR resources from the MIRACUM FHIR Gateway and loads them onto a FHIR Server, such as  
129 BLAZE.

130 **OHDSI Tools:** The OHDSI Tools are provided as Docker containers by Gruhl et al. (28). The basis of  
131 the OHDSI Tools is the OMOP CDM PostgreSQL database, which is divided into the standardized  
132 OMOP CDM data tables v5.3 and the OMOP CDM standardized vocabularies (state February 2023),  
133 such as SNOMED CT (Systematized Nomenclature of Medicine - Clinical Terms), ICD-10-GM  
134 (International Classification of Diseases, German Modification) and OPS (“Operationen- und  
135 Prozedurenschlüssel”, surgery and procedure key). Furthermore, the OHDSI Tools by Gruhl et al. (28)  
136 includes additional dockerized tools for analyzing research data in OMOP CDM: 1) the R-based  
137 application ACHILLES that can be used for data characterization and visualization, 2) the web-based  
138 application ATLAS that can be used for cohort definition and scientific analysis, and 3) the R-based  
139 application Data Quality Dashboard (DQD) that can be used for data quality analysis.

140 **ETL Process FHIR-TO-OMOP:** The ETL Process FHIR-TO-OMOP extracts FHIR resources from  
141 a FHIR Server (e.g., the FHIR Server BLAZE) or from the MIRACUM FHIR Gateway, transforms  
142 them into the standardized format of OMOP CDM and loads them into an OMOP CDM database  
143 (29,30). The application provides HTTP Basic Authentication (27) to enforce access controls to the  
144 FHIR resources of the FHIR server.

145 **TRANSITION Database:** The TRANSITION Database is a relational database that was originally  
146 developed for the semantic mapping of system-specific documented diagnoses to Orpha codes for rare  
147 diseases (23). It is deployed as a PostgreSQL database v14 (22), and offers tables with required  
148 terminology bindings (e.g., FHIR value sets), which can essentially support the semantic mapping of  
149 the RWD to required code systems. For example, the semantic mapping of the gender (e.g. value "1"  
150 for female) to a FHIR ValueSet (e.g. code "female" (24)) can be achieved via the TRANSITION  
151 Database. As an example of the database structure, the table for the semantic mapping of the vital  
152 parameters can be found as a csv file in the Supplementary Materials (S1 file).

153 **Keycloak:** Since medical data needs to be protected in an enhanced manner, the Keycloak server offers  
154 significant advantages (e.g. centralized Identity Management, Customizable Authentication Flows) for  
155 the medical domain, particularly in terms of securing sensitive patient data, ensuring compliance with  
156 healthcare regulations, and facilitating interoperability among diverse healthcare IT systems. The  
157 Authentication Server Keycloak (34) can be used as an OpenID (35), OAuth 2.0 (36), or SAML  
158 Connect provider to validate requests to the FHIR endpoints.

### 159 **2.1.2 Original Contributions - Expanding with Custom Software Additions**

160 We analyzed the already established data provision pipeline at University Hospital Dresden by  
161 consulting experts in the fields of data integration, provision, protection and security. From this, we  
162 derived a generic process for data harmonization and provision. Subsequently, we identified missing  
163 materials, which we have developed and adapted. These are technically described below and further  
164 explained in the Results Section.

165 **Research Data Repository:** In order to be able to provide the ETL process DWH-TO-FHIR to other  
166 sites, a database structure is required which represents medical data and follows the logic of the basic  
167 modules of the FHIR MII CDS specification v1.0 (20). For this reason, we developed the Research  
168 Data Repository (RDR), deployed as a PostgreSQL database v14 (32). This repository encompasses  
169 tables for various FHIR resource types, like *Patient*, *Encounter*, *Condition*, *Observation*, *Procedure*,  
170 *Medication*, and *MedicationAdministration*, and is used for the cross-project and project-related  
171 storage of research data from routine clinical care (RWD).

172 **Structural Mapping Guideline MII CDS:** To reduce implementation time and to facilitate the  
173 specific data mapping, which must be done at each site, the Structural Mapping Guideline MII CDS is  
174 developed (S2 File).

175 **The ETL process RDR-to-FHIR:** To streamline the ETL process to provide RWD in FHIR MII CDS  
176 format, the sub-processes DWH-to-FHIR and ROTATOR were merged into the ETL process RDR-to-  
177 FHIR. RDR-to-FHIR loads project-related RWD from the RDR, constructs FHIR resources according  
178 to the FHIR MII CDS specification v1.0 and loads directly into the FHIR Server without buffering via  
179 the MIRACUM FHIR Gateway. To facilitate process execution, a RESTful API client was  
180 implemented to send data to the FHIR API. To enable OAuth 2.0 (36) authentication against the FHIR  
181 server BLAZE, we have added this authentication method to the application.

182 **ETL Process FHIR-TO-OMOP:** To enable OAuth 2.0 authentication against the FHIR server  
183 BLAZE, we added this authentication method to this application.

## 184 **2.2 Pre-built Packages for data harmonization and provision**

185 We have developed pre-built packages, e.g. for the transformation of RWD to FHIR, to facilitate  
186 creating, running and connecting the multiple services (see section 2.1). In close collaboration with an  
187 interdisciplinary team of software developers, database engineers as well as infrastructure, security,  
188 and usability experts, we defined specific applications and composed the services to easy-to-install,  
189 pre-configurable installation packages based on Docker v24 (37) and Docker Compose v2 (38). We  
190 made our decisions based on previous experience and preliminary works. For testing purposes, we  
191 provided a test dataset.

192 To facilitate data and system administration, we have included the following additional materials in  
193 our packages, which can be used optionally.

194 **pgAdmin:** The open-source administration and management tool pgAdmin4 (39) provides a user-  
195 friendly web interface for the efficient administration of PostgreSQL databases used for RDR,  
196 TRANSITION database, Keycloak, and OMOP CDM.

197 **Portainer:** The open source container administration tool Portainer community edition (40) simplifies  
198 the management of containerized applications that are used to provide all the services described in the  
199 section 2.1. Portainer provides a web interface for interacting with Docker containers (37) to create,  
200 manage, and deploy containers without the need for extensive knowledge of Docker commands.

201

## 202 **2.3 Service Platform Prototype**

203 To support research projects and system administration, we have developed a web-based Service  
204 Platform Prototype that facilitates project-related data provision for research projects. Based on  
205 experience with the design of user interfaces for interactive systems, an initial Low-Fidelity Prototype  
206 of the service platform was created to serve as a basis for discussion for a joint, interdisciplinary  
207 Graphical User Interface (GUI) design. By incorporating feedback from usability experts, this Low-  
208 Fidelity Prototype was iteratively transformed into a High-Fidelity Prototype. To this end, regular joint  
209 meetings were held with software developers and usability experts to ensure that the interaction  
210 principles for design solutions in accordance with ISO 9241-110 (41) were taken into account and  
211 implemented in the service platform interface (task appropriateness, self-descriptiveness, conformity  
212 to expectations, learnability, controllability, robustness against errors, user retention).

213 Our Service Platform Prototype was developed using Quarkus v3.4.3 (42). The frontend provides a  
214 form-based interface for users to specify the services and configurations needed for their project. The  
215 backend, managing the service deployment, is responsible for the instantiation of Docker containers,  
216 network setup, configuration management, and error handling. Angular v16.2.8 (43) was used for the  
217 frontend, complemented by Angular Bootstrap v16.0.0 (44). Communication between the  
218 microservices (e.g., to manage projects and Docker containers) is orchestrated by the Java Docker API  
219 v3.3.3 (45). Communication between the services is facilitated by RabbitMQ (46), a message broker  
220 that ensures reliable and real-time messaging.

## 221 **3 Results**

### 222 **3.1 A generic data harmonization and provision process to foster data availability**

223 We developed a generic process for the project-related provision of research data, which is shown in  
224 Figure 1 and described below.

225 The data provision process begins with a project-independent and site-specific ETL pre-process CDR-  
226 TO-RDR (cf. Figure 1 (Step 1)) that extracts RWD from the CDR, transforms it with the help of the  
227 *Structural Mapping Guideline* and the *TRANSITION Database* to the data structure of the *Research*  
228 *Data Repository (RDR)* and loads it into a *project-independent* instance of the *RDR*.



229 According to the MII concepts, the organizational starting point for the provision of data for a research  
 230 project is a request from the data user. After the technical and legal feasibility check, the required data  
 231 for the study is requested from the *project-independent RDR* instance and masked, pseudonymized or  
 232 anonymized in the subsequent process step to ensure that the research data does not allow any  
 233 conclusions to be drawn about the identity of a patient (Figure 1 (Step 2)).

234 To provide the project-related data in FHIR MII CDS format, instances of *RDR-TO-FHIR* and the  
 235 *FHIR Server BLAZE* are created and the ETL process is executed (Figure 1 (Step 3)). To provide the  
 236 project-related data in the OMOP CDM format, instances of *FHIR-TO-OMOP* and the *OHDSI tools*  
 237 (cf. OHDSI tools) are created and the ETL process is executed (Figure 1 (Step 4)).

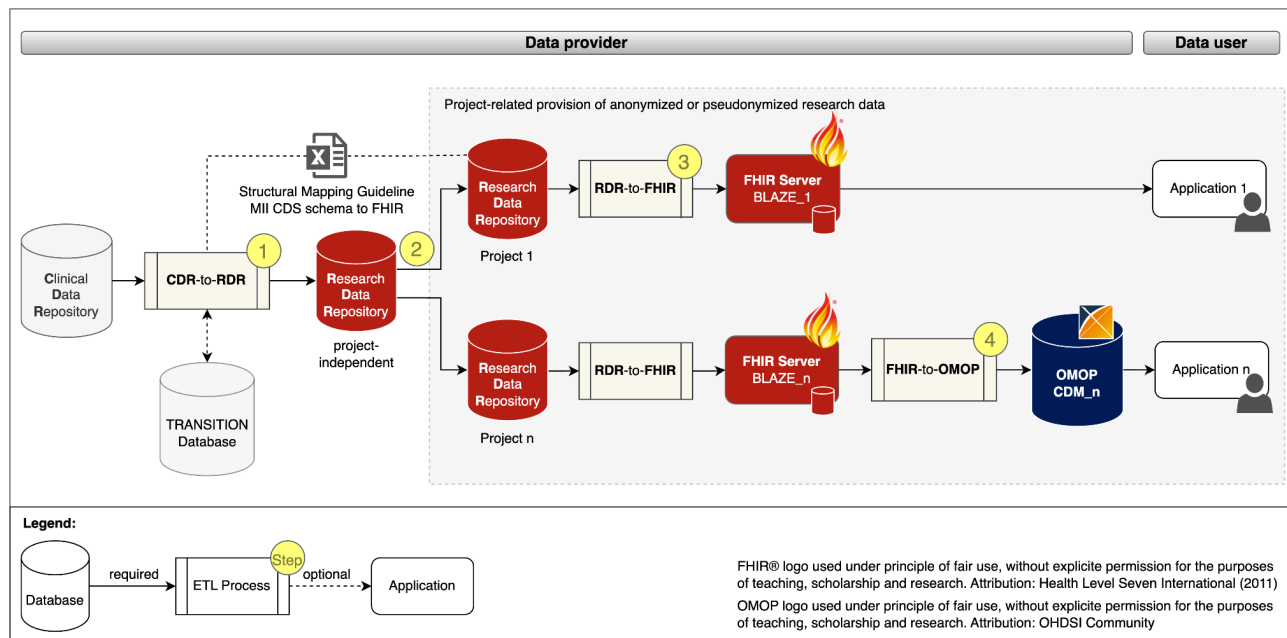

238

239 **Figure 1. Project-related provision of research data for providers and users.** Fast Healthcare Interoperability Resources  
 240 (FHIR); Observational Medical Outcomes Partnership (OMOP); Common Data Model (CDM); Extract Transform Load  
 241 (ETL); Clinical Data Repository (CDR); Research Data Repository (RDR); Medical Informatics Initiative (MII); Core  
 242 dataset (CDS)

### 243 3.2 Pre-built Packages to facilitate interoperability on the fly

244 We developed the following three pre-build packages: 1) ResearchData-TO-FHIR Package for  
 245 converting RWD to FHIR resources (cf. red bordered box in Figure 2), 2) FHIR-TO-OMOP Package  
 246 for converting the FHIR resources to the OMOP CDM format (cf. blue bordered box in Figure 2), and  
 247 3) the Addons Package for deployment of optional services to simplify database, container, and security

248 management (cf. gray bordered box in Figure 2). Figure 2 illustrates the composition of our  
 249 implemented services and the data flows.

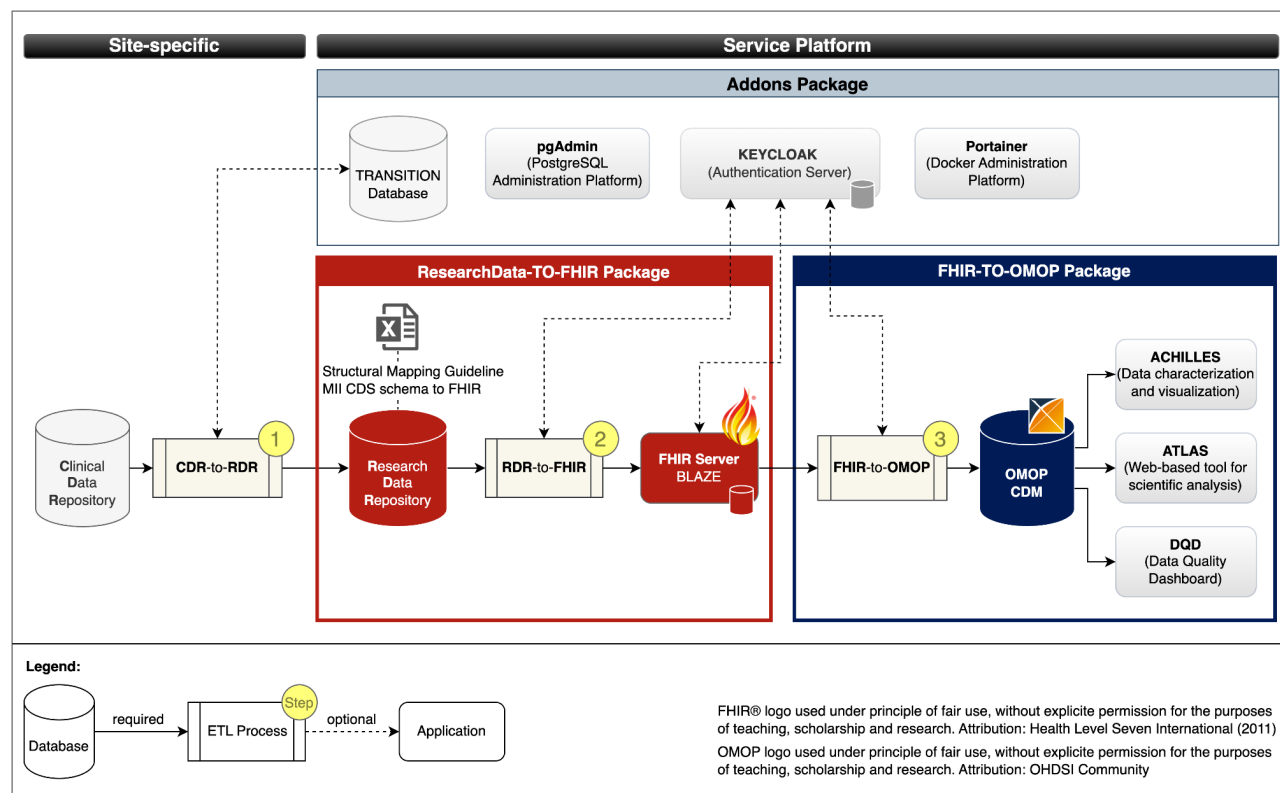

250

251 **Figure 2. Services and data flows.** Fast Healthcare Interoperability Resources (FHIR); Observational Medical Outcomes  
 252 Partnership (OMOP); Common Data Model (CDM); Extract Transform Load (ETL); Clinical Data Repository (CDR);  
 253 Research Data Repository (RDR): Medical Informatics Initiative (MII); Core dataset (CDS)

254 **ResearchData-TO-FHIR Package:** The ResearchData-TO-FHIR Package v2.2.0 (36) provides a  
 255 Docker compose specification that allows to automatically retrieve the images of the *RDR*, the *FHIR*  
 256 *server BLAZE*, and the *RDR-to-FHIR* (cf. section 2.1 and red bordered box in Figure 3), creates Docker  
 257 containers as instances of the images that can be used to provide project-related research data in FHIR  
 258 MII CDS format. For testing purposes, the package provides a test dataset. The package also includes  
 259 the Structural Mapping Guideline (cf. Research Data Repository). By adjusting environment variables,  
 260 the installation is customizable.

261 **FHIR-TO-OMOP Package:** The FHIR-TO-OMOP Package v1.1.0 (37) provides a Docker compose  
 262 specification that allows to automatically retrieve the images of the *OHDSI Tools* and the *FHIR-TO-*  
 263 *OMOP* (cf. section 2.1 and blue bordered box in Figure 3), creates Docker containers as instances of  
 264 the images that can be used to provide project-related research data in OMOP CDM format. Through

265 environment variables, the installation is customizable and the synthetic dataset from the  
266 ResearchData-TO-FHIR package can be used for testing purposes.

267 **Addons Package:** The Addons Package v1.0.0 (38) provides Docker compose specifications that  
268 allow to optionally deploy the PostgreSQL administration platform *pgAdmin*, the *TRANSITION*  
269 *database*, the container administration tool *Portainer* and the Authentication server *Keycloak* with a  
270 demo configuration for protecting the FHIR Server Blaze (cf. ResearchData-TO-FHIR Package).

271 The source code of the ResearchData-TO-FHIR package v2.2.1 (47), the FHIR-TO-OMOP package  
272 v1.1.0 (48) and the Addons package v1.0.0 (49) includes instructions for installation and usage as well  
273 as for further developments.

### 274 **3.3. Service Platform Prototype to enable an easy to use and modular** 275 **infrastructure**

276 While the pre-built packages and their services, which are integrated into the Service Platform  
277 Prototype, were described in 3.2, the Service Platform Prototype v1.0.0 (50) itself is described below.

278 We implemented two key services: 1) the Project Management Service and 2) the Container  
279 Management Service. The Project Management Service allows researchers to create and manage their  
280 research projects. The Container Management Service automates the installation, operation and  
281 administration of services for each research project, such as the launch of ETL-processes and the  
282 display of technical details, such as unique identifiers, Docker names, assigned communication ports  
283 or operational status, to inform users about the current activity and availability of services.

284 The frontend layout contains a navigation bar (Figure 3, A), a sidebar (Figure 3, B) and a main content  
285 area (Figure 3, C+D). The navigation bar offers links to subpages that provide services and further  
286 information on database administration (i.e. via *pgAdmin*), authentication (i.e. *Keycloak*) and container  
287 administration (i.e. *Portainer*). The research projects are listed in the sidebar and new projects can be  
288 created via clicking on the respective button. The main content area is divided horizontally. The upper  
289 area displays the project-related services and offers functions for use and management, such as starting  
290 and stopping the Docker containers, starting the ETL processes, accessing the web frontend of the  
291 services and receiving further information (Figure 3, C). The project-related containers are listed in the  
292 lower area, where further technical details are displayed, e.g. information on Docker containers,  
293 images, communication ports and operating status (Figure 3, D).

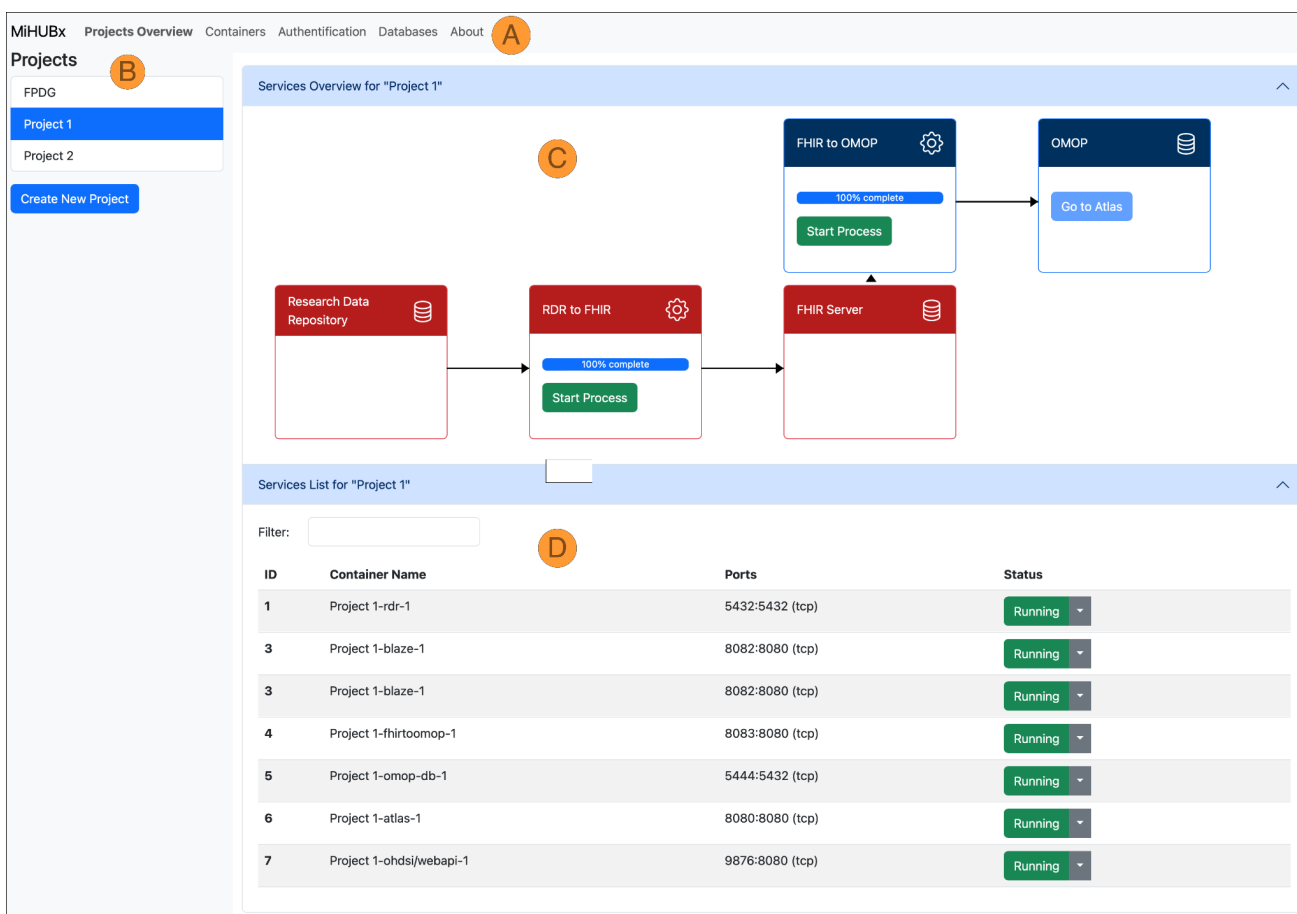

294

295 **Figure 3. Schematic representation of the Service Platform Prototype.** Fast Healthcare Interoperability Resources  
296 (FHIR); Observational Medical Outcomes Partnership (OMOP); Research Data Repository (RDR); Identifier (ID); Medical  
297 Informatics Hub in Saxony (MiHUBx)

298 The demo server, as an instance of the Service Platform Prototype, is available at [https://tu-](https://tu-dresden.de/med/demoserver)  
299 [dresden.de/med/demoserver](https://tu-dresden.de/med/demoserver). This repository (50) also contains the developer documentation,  
300 including initial installation instructions.

## 301 4 Discussion

302 Our aim was to determine which services and processes are required to enable the provision of RWD  
303 for cross-site research and patient care, and how the services can be made available and usable to non-  
304 university healthcare providers with limited resources in a low-threshold manner. In particular, we  
305 determined which services are required for the harmonization of healthcare data into HL7 FHIR  
306 standard-based MII CDS format for intersectoral exchange, and to the OMOP CDM format for national  
307 or even international cross-site research. From this, we derived a process for the project-related  
308 provision of RWD based on the already established data provision pipelines of the university sites (21)

309 in Germany. On this basis, we developed the pre-built packages *ResearchData-TO-FHIR*, *FHIR-TO-*  
310 *OMOP*, and *Addons* for data harmonization and provision to facilitate interoperability on the fly. To  
311 streamline the use of the particular services, especially for non-university healthcare providers, we  
312 developed a versatile and modular Service Platform Prototype that demonstrates the administration of  
313 research projects based on RWD.

314 To the best of our knowledge, our work is the first that shows how services for data harmonization,  
315 provision, and analytics can be provided to non-university healthcare providers in a low-threshold  
316 manner. The proposed Pre-built Packages and Service Platform Prototype streamline the process of  
317 setting up research project environments and reduce the time and technical expertise required to  
318 provide RWD for research studies and feasibility inquiries, such as those conducted by the German  
319 Portal for Medical Research (Deutsches Forschungsdatenportal für Gesundheit, FDPG) (18,51). Even  
320 though admission to the FDPG is currently only possible for sites that participate in the MII (mainly  
321 universities), our work is also highly relevant for non-university service providers, as feasibility studies  
322 can also be carried out using the OHDSI tools. We also consider it likely that our work may be of use  
323 to the European Health Data Space (EHDS) (52) in the future, as our platform can be extended with  
324 appropriate services for data harmonization.

325 Although our work is a big step towards intersectoral provision of RWD, it has some limitations due  
326 to the following factors:

327 1) Healthcare providers use site-specific clinical information systems to store RWD, which have  
328 limited standardized interfaces for the data exchange. Therefore, the RWD from possibly multiple data  
329 sources must be harmonized into the data format of our provided Research Data Repository in a pre-  
330 processing step by the sites themselves, which can be a challenge depending on the type and scope of  
331 data storage, the available human and economic resources and the knowledge of medical informatics.  
332 The legally binding interface specifications currently developed and established in Germany, such as  
333 the HL7 FHIR standard-based *Information technology systems in hospitals* (Informationstechnische  
334 Systeme im Krankenhäusern, ISIK) (53) and *Medical Information Objects* (Medizinische  
335 Informationsobjekte, MIO) (54), could provide a remedy here, as services based on these standards  
336 could be developed and made available via our platform to automatically convert the RWD into the  
337 FHIR MII CDS format for research purposes.

338 2) The FHIR MII CDS v1.0, established as the standard for data exchange within the MII, presents  
339 certain limitations, particularly in its dataset specifications for specific medical fields like oncology

340 and ophthalmology. Although plans are in place to refine profiles for oncology in the upcoming FHIR  
341 MII CDS v2, there remains a need to develop more appropriate dataset specifications for specific  
342 medical domains. These improvements are crucial for effectively incorporating such specifications into  
343 similar service platforms, especially in key areas like *Observations, Imaging Studies, Diagnostic*  
344 *Reports, Procedures, and Medication Administrations*.

345 3) In addition, the services/applications cannot yet be installed "out of the box" via the frontend. In  
346 order to further minimize the technical hurdle, this is an important goal for the future.

347 Despite the limitations, our Pre-built Packages together with the Service Platform Prototype can  
348 already be used to provide data for specific research projects in a time-saving manner. We believe that  
349 our research represents a significant contribution in research data management, offering an efficient,  
350 user-friendly, and reproducible way to establish project-specific data provision pipelines. This may  
351 make our work interesting not only for non-university service providers, but also for university sites.  
352 In addition, our Service Platform Prototype can serve as a foundation for third-party applications, e.g.  
353 based on SMART-on-FHIR, which can be used not only for research but also for patient care.

354 Next, we will implement the Service System Platform at two non-university hospitals in Germany as  
355 part of a pilot study. In order to achieve a high level of acceptance among end users, we will test its  
356 functionality and usability. As part of the roll-out, an accompanying acceptance analysis in the form  
357 of an observation protocol and in-depth face-to-face interviews will be conducted to ensure the solution  
358 is usable and sustainable. For this purpose, we collaborate closely with experts from the fields of  
359 technology acceptance and usability. Thanks to our heterogeneous teams, the interdisciplinary  
360 perspective can have a supportive effect in order to strengthen user-friendliness and thereby actual  
361 usage of the Service System Platform.

## 362 **5 Conclusions**

363 In conclusion, the developed Service Platform Prototype together with the Pre-built Packages represent  
364 an essential step forward in managing and facilitating medical research studies, with an emphasis on  
365 data harmonization, resource efficiency, data security, and collaborative effectiveness.

## 366 **6 Conflict of Interest**

367 The authors declare that the research was conducted in the absence of any commercial or financial  
368 relationships that could be construed as a potential conflict of interest.

## 369 **7 Author Contributions**

370 KH: Conceptualization, Investigation, Methodology, Software, Visualization, Project administration,  
371 Writing – original draft, Writing – review & editing; IN: Conceptualization, Methodology, Software,  
372 Project administration, Writing – review & editing; YP: Resources, Software, Writing – review &  
373 editing; EH: Resources, Software, Writing – review & editing; DB: Resources, Software, Writing –  
374 review & editing; CK: Software, Writing – review & editing; MG: Resources, Writing – review &  
375 editing; MB: Validation, Writing – review & editing; FN: Writing – review & editing; RG: Writing –  
376 review & editing; SG: Resources, Writing – review & editing; AS: Resources, Writing – review &  
377 editing; FB: Conceptualization, Funding acquisition, Resources, Writing – review & editing; IR:  
378 Resources, Writing – review & editing; MW: Supervision, Writing – review & editing; JW: Writing –  
379 review & editing; MS: Funding acquisition, Supervision, Writing – review & editing.

## 380 **8 Funding**

381 This research was funded by the German Federal Ministry of Education and Research  
382 (<https://www.bmbf.de/en>) within the project “Medical Informatics Hub in Saxony (MiHUBx)”. Grant  
383 numbers 01ZZ2101A (Dresden) and 01ZZ2101E (Chemnitz). The funders had no role in study design,  
384 data collection and analysis, decision to publish, or preparation of the manuscript.

## 385 **9 Acknowledgments**

386 Not applicable.

## 387 **10 Reference**

- 388 1. Bathelt F, Reinecke I, Peng Y, Henke E, Weidner J, Bartos M, et al. Opportunities of Digital  
389 Infrastructures for Disease Management—Exemplified on COVID-19-Related Change in  
390 Diagnosis Counts for Diabetes-Related Eye Diseases. *Nutrients*. 2022 May 11;14(10):2016.
- 391 2. Liu F, Panagiotakos D. Real-world data: a brief review of the methods, applications, challenges  
392 and opportunities. *BMC Medical Research Methodology*. 2022 Nov 5;22(1):287.
- 393 3. Orsini LS, Berger M, Crown W, Daniel G, Eichler HG, Goettsch W, et al. Improving  
394 Transparency to Build Trust in Real-World Secondary Data Studies for Hypothesis Testing—  
395 Why, What, and How: Recommendations and a Road Map from the Real-World Evidence  
396 Transparency Initiative. *Value in Health*. 2020 Sep;23(9):1128–36.

- 397 4. Kalra D. The importance of real-world data to precision medicine. *Personalized Medicine*.  
398 2019 Mar;16(2):79–82.
- 399 5. Wolfien M, Ahmadi N, Fitzer K, Grummt S, Heine KL, Jung IC, et al. Ten Topics to Get  
400 Started in Medical Informatics Research. *J Med Internet Res*. 2023 Jul 24;25:e45948.
- 401 6. Gehring S, Eulenfeld R. German Medical Informatics Initiative: Unlocking Data for Research  
402 and Health Care. *Methods Inf Med*. 2018 Jul;57(S 01):e46–9.
- 403 7. Semler S, Wissing F, Heyder R. German Medical Informatics Initiative: A National Approach  
404 to Integrating Health Data from Patient Care and Medical Research. *Methods Inf Med*. 2018  
405 Jul;57(S 01):e50–6.
- 406 8. Medical Informatics Initiative. The Medical Informatics Initiative’s core data set [Internet].  
407 [cited 2023 Dec 6]. Available from: [https://www.medizininformatikinitiative.de/en/medical-](https://www.medizininformatikinitiative.de/en/medical-informatics-initiatives-core-data-set)  
408 [informatics-initiatives-core-data-set](https://www.medizininformatikinitiative.de/en/medical-informatics-initiatives-core-data-set)
- 409 9. HL7.org, Health Level Seven International Fast Healthcare Interoperability Resources (HL7  
410 FHIR) [Internet]. [cited 2023 Dec 15]. Available from: <http://hl7.org/fhir/>
- 411 10. Mandel JC, Kreda DA, Mandl KD, Kohane IS, Ramoni RB. SMART on FHIR: a standards-  
412 based, interoperable apps platform for electronic health records. *Journal of the American*  
413 *Medical Informatics Association*. 2016 Sep 1;23(5):899–908.
- 414 11. HL7 International [Internet]. [cited 2024 Jan 13]. Available from: <https://www.hl7.org>
- 415 12. OHDSI.org [Internet]. [cited 2024 Jan 13]. Available from: <https://www.ohdsi.org>
- 416 13. Hripcsak G, Duke JD, Shah NH, Reich CG, Huser V, Schuemie MJ, et al. Observational Health  
417 Data Sciences and Informatics (OHDSI): Opportunities for Observational Researchers. *Stud*  
418 *Health Technol Inform*. 2015;216:574–8.
- 419 14. OHDSI.org, HL7 International and OHDSI Announce Collaboration to Provide Single  
420 Common Data Model for Sharing Information in Clinical Care and Observational Research  
421 [Internet]. [cited 2024 Jan 13]. Available from: <https://www.ohdsi.org/ohdsi-hl7-collaboration/>
- 422 15. OMOP Common Data Model – OHDSI [Internet]. [cited 2023 Dec 15]. Available from:  
423 <https://www.ohdsi.org/data-standardization/>
- 424 16. OHDSI.org, Software tools [Internet]. [cited 2024 Jan 13]. Available from:  
425 <https://www.ohdsi.org/software-tools/>
- 426 17. Prokosch HU, Bahls T, Bialke M, Eils J, Fegeler C, Gruendner J, et al. The COVID-19 Data  
427 Exchange Platform of the German University Medicine. In: Séroussi B, Weber P, Dhombres F,  
428 Grouin C, Liebe JD, Pelayo S, et al., editors. *Studies in Health Technology and Informatics*



- 429 [Internet]. IOS Press; 2022 [cited 2024 Jan 15]. Available from:  
430 <https://ebooks.iospress.nl/doi/10.3233/SHTI220554>
- 431 18. Prokosch HU, Gebhardt M, Gruendner J, Kleinert P, Buckow K, Rosenau L, et al. Towards a  
432 National Portal for Medical Research Data (FDPG): Vision, Status, and Lessons Learned. In:  
433 Hägglund M, Blusi M, Bonacina S, Nilsson L, Cort Madsen I, Pelayo S, et al., editors. *Studies*  
434 *in Health Technology and Informatics* [Internet]. IOS Press; 2023 [cited 2024 Jan 7]. Available  
435 from: <https://ebooks.iospress.nl/doi/10.3233/SHTI230124>
- 436 19. MiHUBx: ein digitales Ökosystem für Forschung, Diagnostik und Therapie [Internet].  
437 Deutsche Zentrum für Luft und Raumfahrt e.V. - DLR Gesundheitsforschung; [cited 2023 Dec  
438 15]. Available from: [https://www.gesundheitsforschung-bmbf.de/de/mihubx-ein-digitales-](https://www.gesundheitsforschung-bmbf.de/de/mihubx-ein-digitales-okosystem-fur-forschung-diagnostik-und-therapie-13054.php)  
439 [okosystem-fur-forschung-diagnostik-und-therapie-13054.php](https://www.gesundheitsforschung-bmbf.de/de/mihubx-ein-digitales-okosystem-fur-forschung-diagnostik-und-therapie-13054.php)
- 440 20. Basismodule des Kerndatensatzes der MII | Medizininformatik-Initiative [Internet]. [cited 2023  
441 Dec 15]. Available from: [https://www.medizininformatik-initiative.de/de/basismodule-des-](https://www.medizininformatik-initiative.de/de/basismodule-des-kerndatensatzes-der-mii)  
442 [kerndatensatzes-der-mii](https://www.medizininformatik-initiative.de/de/basismodule-des-kerndatensatzes-der-mii)
- 443 21. Prokosch HU, Acker T, Bernarding J, Binder H, Boeker M, Boerries M, et al. MIRACUM:  
444 Medical Informatics in Research and Care in University Medicine: A Large Data Sharing  
445 Network to Enhance Translational Research and Medical Care. *Methods Inf Med*. 2018  
446 Jul;57(S 01):e82–91.
- 447 22. Miracum.org, MIRACOLIX Tools [Internet]. [cited 2024 Jan 15]. Available from:  
448 <https://www.miracum.org/das-konsortium/datenintegrationszentren/miracolix-tools/>
- 449 23. Kiel A. Blaze FHIR® Server with internal, fast CQL Engine [Internet]. [cited 2023 Dec 15].  
450 Available from: <https://sampler.github.io/blaze/>
- 451 24. Schüttler C, Prokosch HU, Hummel M, Lablans M, Kroll B, Engels C, et al. The journey to  
452 establishing an IT-infrastructure within the German Biobank Alliance. Ahmed Z, editor. *PLoS*  
453 *ONE*. 2021 Sep 22;16(9):e0257632.
- 454 25. Gruendner J, Deppenwiese N, Folz M, Köhler T, Kroll B, Prokosch HU, et al. The Architecture  
455 of a Feasibility Query Portal for Distributed COVID-19 Fast Healthcare Interoperability  
456 Resources (FHIR) Patient Data Repositories: Design and Implementation Study. *JMIR Med*  
457 *Inform*. 2022 May 25;10(5):e36709.
- 458 26. GitHub. FHIR gateway. [Internet]. [cited 2024 Jan 15]. Available from:  
459 <https://github.com/miracum/fhir-gateway>
- 460 27. Basic HTTP Authentication Scheme RFC 7617 [Internet]. [cited 2023 Jan 5]. Available from:  
461 <https://datatracker.ietf.org/doc/html/rfc7617>

- 462 28. Gruhl M, Reinecke I, Sedlmayr M. Specification and Distribution of Vocabularies Among  
463 Consortial Partners. *Stud Health Technol Inform*. 2020 Jun 16;270:1393–4.
- 464 29. Peng Y, Henke E, Reinecke I, Zoch M, Sedlmayr M, Bathelt F. An ETL-process design for  
465 data harmonization to participate in international research with German real-world data based  
466 on FHIR and OMOP CDM. *International Journal of Medical Informatics*. 2023 Jan  
467 1;169:104925.
- 468 30. Henke E, Peng Y, Reinecke I, Zoch M, Sedlmayr M, Bathelt F. An ETL-process design for  
469 incremental loading German real-world data based on FHIR and OMOP CDM: Algorithm  
470 Development and Validation (Preprint). *JMIR Medical Informatics* [Internet]. 2023 Mar 15  
471 [cited 2023 Aug 25]; Available from: <http://preprints.jmir.org/preprint/47310/accepted>
- 472 31. Kümmel M, Reinecke I, Gruhl M, Bathelt F, Sedlmayr M. Transition Database for a  
473 harmonized mapping of German patient data to the OMOP CDM - The ‘German TDB’  
474 [Internet]. 2020 [cited 2023 Nov 15]. Available from: [https://www.ohdsi.org/wp-](https://www.ohdsi.org/wp-content/uploads/2020/05/13_Poster.pdf)  
475 [content/uploads/2020/05/13\\_Poster.pdf](https://www.ohdsi.org/wp-content/uploads/2020/05/13_Poster.pdf)
- 476 32. PostgreSQL: The World’s Most Advanced Open Source Relational Database [Internet]. [cited  
477 2023 Dec 15]. Available from: <https://www.postgresql.org>
- 478 33. HL7.org, FHIR Core R4, Administrative Gender [Internet]. [cited 2024 Jan 3]. Available from:  
479 <https://hl7.org/fhir/r4/valueset-administrative-gender.html>
- 480 34. Keycloak: Open Source Identity and Access Management [Internet]. Available from:  
481 <https://www.keycloak.org>
- 482 35. OpenID. OpenID. San Ramon, CA: OpenID Foundation [Internet]. 2023 [cited 2023 Dec 18].  
483 Available from: <https://openid.net/connect/>
- 484 36. OAuth 2.0 RFC 6749, Section 4.4: Client Credentials Flow [Internet]. Available from:  
485 <https://datatracker.ietf.org/doc/html/rfc6749#section-4.4>
- 486 37. docker: Make better, secure software from the start [Internet]. [cited 2023 Dec 16]. Available  
487 from: <https://www.docker.com>
- 488 38. docker.com, Docker compose [Internet]. [cited 2014 Jan 19]. Available from:  
489 <https://docs.docker.com/compose/>
- 490 39. pgAdmin: Open Source administration and development platform for PostgreSQL [Internet].  
491 [cited 2023 Dec 29]. Available from: <https://www.pgadmin.org>
- 492 40. Portainer: Container Management Software for Kubernetes and Docker [Internet]. [cited 2023  
493 Dec 29]. Available from: <https://www.portainer.io>

- 494 41. Geis T, Tesch G. Basiswissen Usability und User Experience: Aus- und Weiterbildung zum  
495 UXQB Certified Professional for Usability and User Experience (CPUX) - Foundation Level  
496 (CPUX-F). 2., überarbeitete und aktualisierte Auflage. Heidelberg: dpunkt.verlag; 2023. 312 p.
- 497 42. Quarkus: A Kubernetes Native Java stack tailored for OpenJDK HotSpot and GraalVM, crafted  
498 from the best of breed Java libraries and standards. [Internet]. [cited 2023 Dec 16]. Available  
499 from: <https://quarkus.io>
- 500 43. Angular: The web development framework for building the future [Internet]. [cited 2023 Dec  
501 16]. Available from: <https://angular.io>
- 502 44. Bootstrap widgets: The angular way [Internet]. [cited 2024 Jan 9]. Available from: [https://ng-  
503 bootstrap.github.io/](https://ng-bootstrap.github.io/)
- 504 45. gitHub, Java Docker API Client [Internet]. [cited 2024 Jan 8]. Available from:  
505 <https://github.com/docker-java/docker-java>
- 506 46. RabbitMQ: Message Broker [Internet]. [cited 2023 Dec 16]. Available from:  
507 <https://www.rabbitmq.com>
- 508 47. ResearchData-TO-FHIR Package [Internet]. Available from:  
509 <https://gitlab.ukdd.de/pub/mihubx/researchdata-to-fhir-install-pkg>
- 510 48. FHIR-TO-OMOP package [Internet]. Available from: [https://gitlab.ukdd.de/mihubx/fhir-to-  
511 omop-install-pkg](https://gitlab.ukdd.de/mihubx/fhir-to-omop-install-pkg)
- 512 49. Addons package [Internet]. Available from: <https://gitlab.ukdd.de/mihubx/addons-install-pkg>
- 513 50. MiHUBx Service Platform Prototype [Internet]. [cited 2024 Jan 23]. Available from:  
514 <https://gitlab.ukdd.de/pub/mihubx/mihubx-service-portal>
- 515 51. Das Deutsche Forschungsportal für Gesundheit (FDPG) [Internet]. [cited 2024 Jan 7].  
516 Available from: <https://forschen-fuer-gesundheit.de>
- 517 52. Horgan D, Hajduch M, Vrana M, Soderberg J, Hughes N, Omar MI, et al. European Health  
518 Data Space—An Opportunity Now to Grasp the Future of Data-Driven Healthcare. Healthcare.  
519 2022 Aug 26;10(9):1629.
- 520 53. gematik, ISiK – Informationstechnische Systeme in Krankenhäusern. [Internet]. [cited 2024 Jan  
521 7]. Available from: <https://fachportal.gematik.de/informationen-fuer/isik>
- 522 54. KBV, MIO - Medizinische Informationsobjekte. [Internet]. Available from:  
523 <https://mio.kbv.de/site/mio>

524

## 525 **11 Supplementary Material**

526 S1 File: Example table for the semantic mapping of vital parameter:  
527 observation\_vital\_parameter\_loinc\_code.csv

528 (CSV)

529 S2 File: Structural Mapping Guideline MII CDS schema to FHIR

530 (Excel)

## 531 **12 Data Availability Statement**

532 The source code of the pre-built packages “ResearchData-to-FHIR v2.2.0”, “FHIR-to-OMOP v1.1.0”,  
533 “Addons v1.0.0” and “MiHUBx Service Platform v1.0.0” can be downloaded from the GitLab  
534 repository at <https://gitlab.ukdd.de/pub/mihubx>. These repositories include the test datasets, developer  
535 documentation and the initial installation instructions.

Project-related provision of anonymized or pseudonymized research data

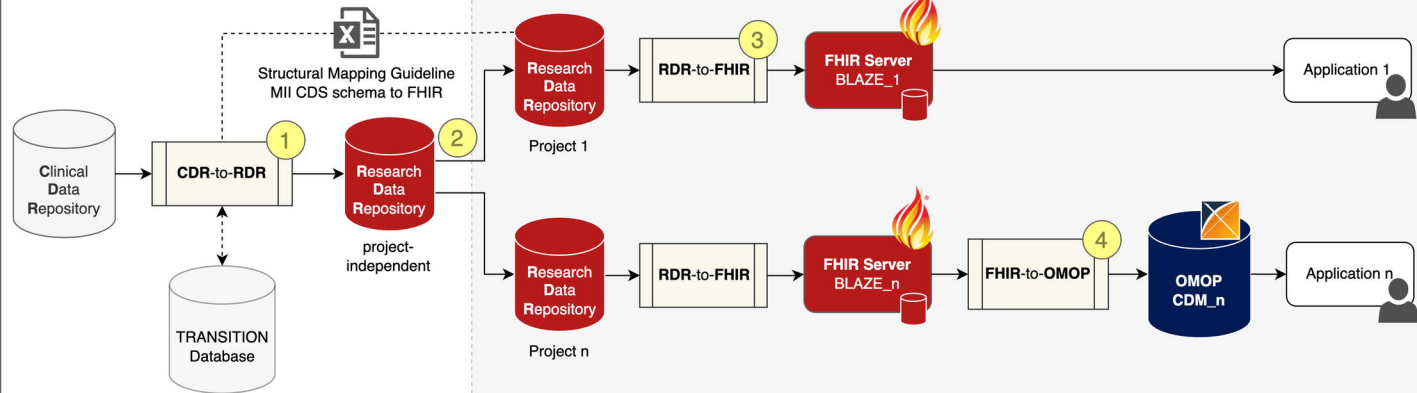

FHIR® logo used under principle of fair use, without explicit permission for the purposes of teaching, scholarship and research. Attribution: Health Level Seven International (2011)

OMOP logo used under principle of fair use, without explicit permission for the purposes of teaching, scholarship and research. Attribution: OHDSI Community

## Site-specific

## Service Platform

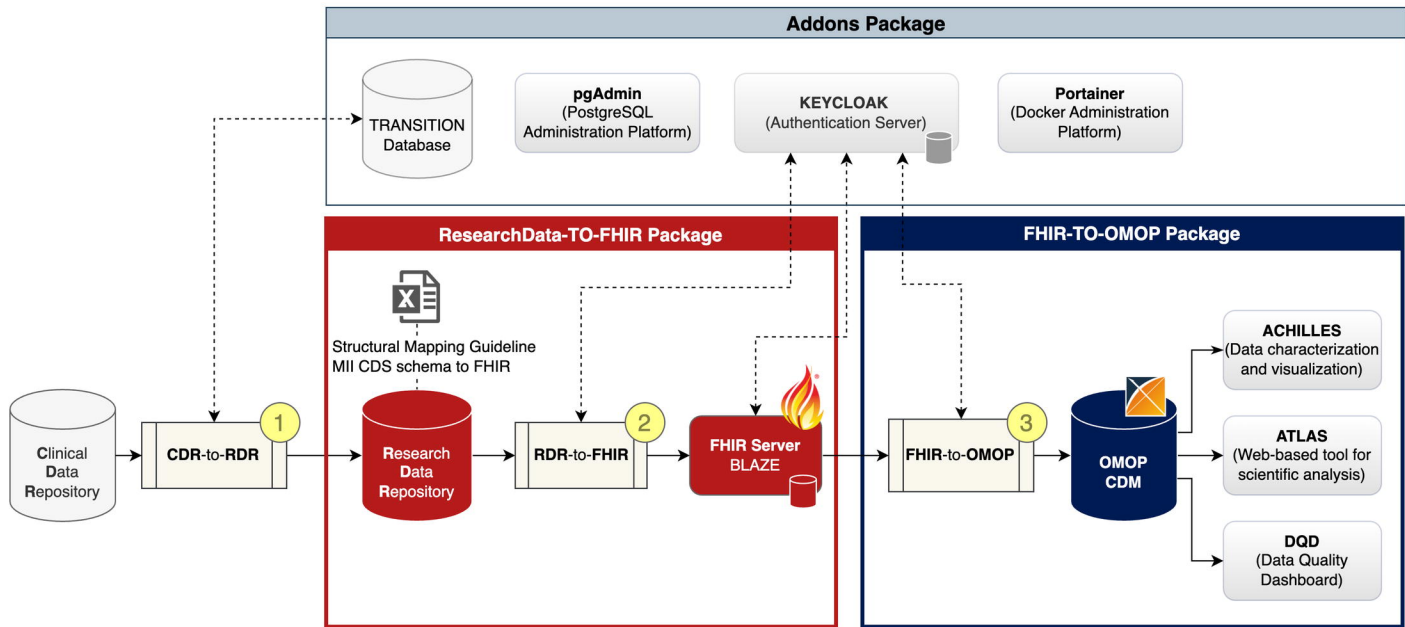

### Legend:

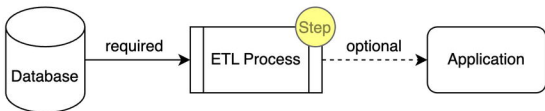

FHIR® logo used under principle of fair use, without explicit permission for the purposes of teaching, scholarship and research. Attribution: Health Level Seven International (2011)  
 OMOP logo used under principle of fair use, without explicit permission for the purposes of teaching, scholarship and research. Attribution: OHDSI Community

Projects

FPDG

**Project 1**

Project 2

Create New Project

Services Overview for "Project 1"

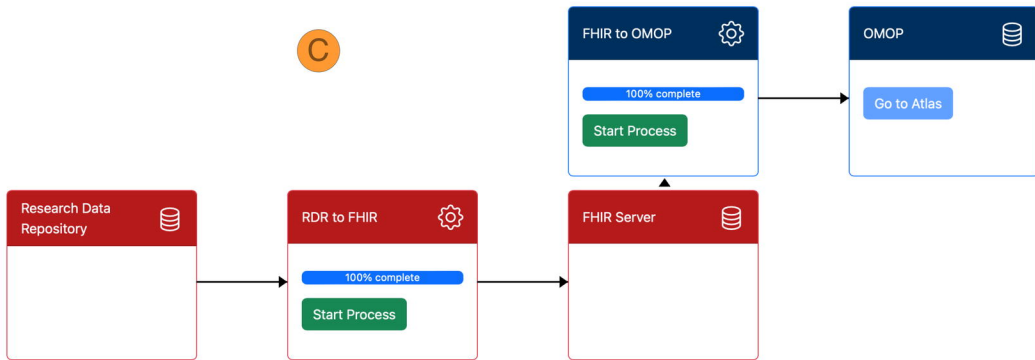

Services List for "Project 1"

Filter:

| ID | Container Name           | Ports           | Status  |
|----|--------------------------|-----------------|---------|
| 1  | Project 1-rdr-1          | 5432:5432 (tcp) | Running |
| 3  | Project 1-blaze-1        | 8082:8080 (tcp) | Running |
| 3  | Project 1-blaze-1        | 8082:8080 (tcp) | Running |
| 4  | Project 1-fhirtoomop-1   | 8083:8080 (tcp) | Running |
| 5  | Project 1-omop-db-1      | 5444:5432 (tcp) | Running |
| 6  | Project 1-atlas-1        | 8080:8080 (tcp) | Running |
| 7  | Project 1-ohdsi/webapi-1 | 9876:8080 (tcp) | Running |
